# Supplementary material for: Role of non-native electrostatic interactions in the coupled folding and binding of PUMA with Mcl-1
Source: PubMed Central journal article supplement (PMC5400261; doi:10.1371/journal.pcbi.1005468), 2017-04-03
Supplement: pcbi.1005468.s006.pdf [file pcbi.1005468.s006.pdf]

Supplementary Materials:  
Role of Non-Native Electrostatic Interactions in the  
Coupled Folding and Binding of PUMA with Mcl-1

Wen-Ting Chu<sup>1</sup>, Jane Clarke<sup>2</sup>, Sarah L. Shammash<sup>2,3\*</sup> and Jin Wang<sup>1,4\*</sup>

<sup>1</sup>*State Key Laboratory of Electroanalytical Chemistry, Changchun Institute of Applied Chemistry, Chinese Academy of Sciences, Changchun, Jilin, 130022, China*

<sup>2</sup>*Department of Chemistry, University of Cambridge, Lensfield Road, Cambridge, CB2 1EW, United Kingdom*

<sup>3</sup>*Department of Biochemistry, University of Oxford, South Parks Road, Oxford, OX1 3QU, United Kingdom*

<sup>4</sup>*Department of Chemistry & Physics, State University of New York at Stony Brook, Stony Brook, NY, 11794, USA*

*\*Corresponding Author: sarah.shammash@bioch.ox.ac.uk; jin.wang.1@stonybrook.edu*

# 1 Methods

## 1.1 Calibrating the CG model

For the structure-based model run with reduced units, we calibrated the simulation temperature firstly. We ran REMD simulations with 48 replicas ranging from 29.12 K to 200.43 K to determine the folding temperature  $T_f$ . According to the specific heat curve calculated by REMD runs, the  $T_f$  of Mcl-1 is 154 K, which corresponds to the melting temperature (57 °C) of Mcl-1 in experiment<sup>1</sup>. Therefore, simulation temperature 129 K will be comparable to the room temperature (298 K).

The native nonbonded potential can be separated into intra- and inter-molecular terms:

$$V_{nonbonded}^{native} = \alpha V_{intra}^{native} + \beta V_{inter}^{native} \quad (\text{ESI-1})$$

The energy of intramolecular interactions within PUMA were rescaled by altering the  $\alpha$  parameter of PUMA to match the helical content in the experiments. 1  $\mu$ s simulation were performed to calibrate  $\alpha$ . The fraction of helix was calculated from the number of consecutive torsions. In our simulation, a residual helix requires at least 3 consecutive torsions between 30° and 120°, similar as the settings in previous simulations<sup>1,2</sup>. The alpha helical content of PUMA in complex (pdb 2ROC) is about 70%, which is consistent with the experimental data (about 65%)<sup>1</sup>. In experiments, the alpha helical content of PUMA in unbound state is about 20%, which corresponds to 0.7 in  $\alpha$ .

Finally, the energy of intermolecular interaction between Mcl-1 and PUMA were rescaled by altering the  $\beta$  parameter between Mcl-1 and PUMA to match the dissociation constant ( $K_d$ ) in experiment. The reported  $K_d$  of Mcl-1 and PUMA complex is 0.69 nM<sup>3</sup>, which means that the binding energy between Mcl-1 and PUMA is about  $-7.39 kT$ . Metadynamics runs determined the  $\beta$  parameter to be 0.9.

## 1.2 Molecular Dynamics Simulations

All simulations were performed with Gromacs 4.5.5<sup>4</sup>. The coarse grained molecular dynamics simulations (CGMD) used Langevin equation with constant friction coefficient  $\gamma = 1.0$ . The cutoff for nonbonded interactions was set to 3.0 nm, and all bonds were constrained using LINCS algorithm<sup>5</sup>.

The MD time step was set to 2.0 fs and the trajectories were saved every 2 ps. To enhance the sampling of binding events, a strong harmonic potential was added if the distance between the center of mass of the two chains of complex is greater than 6 nm. These conditions correspond to an effective protein concentration of 3.6 mM.

REMD simulations<sup>6</sup> were performed to determine the folding temperature of Mcl-1. 48 parallel replicas with temperature ranging from 29.12 K to 200.43 K ensure an efficient sampling. Each replica was performed for  $1 \times 10^9$  MD steps. The exchanges were attempted every 5000 steps.

For thermodynamical simulations, well-tempered bias-exchange (WTBE) metadynamic runs were performed to overcome the high energy barriers between bound and unbound states of Mcl-1 and PUMA complex<sup>7-10</sup>. We define a native contact is formed if the  $C\alpha$ - $C\alpha$  distance between any given native atom pair is within 1.2 times of its native distance. The native distance is calculated from the initial structure model. In WTBE run, 2 replicas, one with bias on the intermolecular contact and one with no bias (neutral) were performed in parallel. The fraction of intermolecular native contact number ( $Q_{inter}$ ), fraction of intramolecular native contact number ( $Q_{intra}$ ), and the helix content were collected as CV1, CV2, and CV3 in the metadynamic runs, respectively. A Gaussian of height 0.5 kJ/mol was added every 1 ps to the bias potential for all the walkers. The bias factor of well-tempered run was set to 10.0. Finally, WHAM<sup>11</sup> was applied to construct the energy landscape of binding-unbinding process.

For kinetics simulations, we ran 200 individual molecular simulations, each started from varying unbound configurations at 129 K simulation temperature, mimicking room temperature. During each simulation, the unbound state is the initial state, having no intermolecular contacts ( $Q_{inter} = 0$ ). An encounter complex (EC) is defined once one or more native contacts are formed ( $Q_{inter} > 0$ ); these are loosely bound states formed by capture events. The EC proceeds either to escape to the unbound state ( $Q_{inter} = 0$ ), or form the bound state ( $Q_{inter} \sim 0.7$ ). Simulations were ended upon reaching the bound state<sup>12,13</sup>. The mean passage time (MPT) of capture process (from unbound state to EC state,  $MPT_{cap}$ ), first passage time (FPT) of evolution process (from EC state to bound state,  $FPT_{evo}$ ), and first passage time (FPT) of binding-on process (from unbound state to bound state,  $FPT_{on}$ ) were collected to compare the rate of binding in different conditions.

## References

- [1] Rogers JM, Oleinikovas V, Shammass SL, Wong CT, De Sancho D, Baker CM, et al. Interplay between partner and ligand facilitates the folding and binding of an intrinsically disordered protein. *Proceedings of the National Academy of Sciences*. 2014;111(43):15420–15425.
- [2] De Sancho D, Best RB. Modulation of an IDP binding mechanism and rates by helix propensity and non-native interactions: Association of HIF1 $\alpha$  with CBP. *Molecular BioSystems*. 2012;8(1):256–267.
- [3] Rogers JM, Steward A, Clarke J. Folding and binding of an intrinsically disordered protein: fast, but not "diffusion-limited". *Journal of the American Chemical Society*. 2013;135(4):1415–1422.
- [4] Hess B, Kutzner C, Van Der Spoel D, Lindahl E. GROMACS 4: algorithms for highly efficient, load-balanced, and scalable molecular simulation. *Journal of chemical theory and computation*. 2008;4(3):435–447.
- [5] Hess B, Bekker H, Berendsen HJ, Fraaije JG, et al. LINCS: a linear constraint solver for molecular simulations. *Journal of computational chemistry*. 1997;18(12):1463–1472.
- [6] Sugita Y, Okamoto Y. Replica-exchange molecular dynamics method for protein folding. *Chemical physics letters*. 1999;314(1):141–151.
- [7] Baftizadeh F, Cossio P, Pietrucci F, Laio A. Protein folding and ligand-enzyme binding from bias-exchange metadynamics simulations. *Current Physical Chemistry*. 2012;2(1):79–91.
- [8] Marinelli F, Pietrucci F, Laio A, Piana S. A kinetic model of trp-cage folding from multiple biased molecular dynamics simulations. *PLoS Comput Biol*. 2009;5(8):e1000452.
- [9] Biarnés X, Pietrucci F, Marinelli F, Laio A. METAGUI. A VMD interface for analyzing metadynamics and molecular dynamics simulations. *Computer Physics Communications*. 2012;183(1):203–211.
- [10] Barducci A, Bussi G, Parrinello M. Well-tempered metadynamics: A smoothly converging and tunable free-energy method. *Physical review letters*. 2008;100(2):020603.

- [11] Grossfield A. WHAM: the weighted histogram analysis method. Disponivel em; <http://membrane.urmc.rochester.edu/content/wham>. 2012;.
- [12] Huang Y, Liu Z. Kinetic advantage of intrinsically disordered proteins in coupled folding–binding process: a critical assessment of the "fly-casting" mechanism. *Journal of molecular biology*. 2009;393(5):1143–1159.
- [13] Chu X, Liu F, Maxwell BA, Wang Y, Suo Z, Wang H, et al. Dynamic Conformational Change Regulates the Protein-DNA Recognition: An Investigation on Binding of a Y-Family Polymerase to Its Target DNA. *PLoS Computational Biology*. 2014;10(9):e1003804.
